# Supplementary material
Source: publisher site journal article supplement (https://www.dovepress.com/get_supplementary_file.php?f=370623.docx)
Supplement: Supplementary file 1 [file get_supplementary_file.php]

**SUPPLEMENTARY MATERIALS**

**Table S1:** Lists ofAsthma-related medications with Active ingredients, and Drug Identification Numbers (DINs) selected from the PharmaNet database

| **Medication categories** | **Active ingredients** | **Used for case definition** | **Drug Identification Number (DIN)** |
| --- | --- | --- | --- |
| Inhaled corticosteroids (ICS) | Beclometasone | Yes | 2242030, 2242029, 374407, 828521, 828548, 872334, 893633, 897353, 1949993, 1950002, 2079976, 2213710, 2213729, 2215039, 2215047, 2215055, 2216531 |
| Budesonide | Yes | 2229099, 1978918, 1978926, 852074, 851752, 851760 |
| Fluticasone | Yes | 2237247, 2237246, 2237245, 2237244, 2244293, 2244292, 2244291, 2174731, 2174758, 2174766, 2174774, 2213583, 2213591, 2213605, 2213613 |
| Ciclesonide | Yes | 2285614, 2285606, 2303671 |
| Short-acting beta-agonists (SABA) | Salbutamol | Yes | 790419, 812463, 832758, 832766, 851841, 860808, 867179, 897345, 1926934, 1938851, 1938878, 1945203, 1947222, 1986864, 2022125, 2046741, 2048760, 2069571, 2084333, 2148617, 2154412, 2173360, 2208229, 2208237, 2208245 2212315, 2212323, 2213400, 2213419, 2213427, 2213478, 2213486, 2214997, 2215004, 2215616, 2215624, 2215632, 2216949, 2231430, 2231488, 2231678, 2231783, 2231784, 2232570, 2232987, 2236931, 2236932, 2236933, 2239365, 2239366, 2241497, 2243115, 2243828, 2244914, 2245669, 2259583, 2326450 |
| Yes | 620955, 620963, 874086, 894249, 894257, 1932691, 2035421, 2063689, 2091186, 2146843, 2146851, 2164434, 2164442, 2165368, 2165376, 2212390, 2213435, 2213443, 2213451, 2261324 |
| Terbutaline | Yes | 786616 |
| Orciprenaline | Yes | 249920, 3891, 2236783, 2229862, 2152568, 2192675 |
| Long-acting beta-agonists (LABA) | Salmeterol | Yes | 2211742, 2214261, 2231129, 2136139, 2136147 |
| Formoterol | Yes | 2230898, 2237224, 2237225 |
| ICS and LABA in combination (ICS/LABA) | Budesonide, formoterol | Yes | 2245385, 2245386 |
| Fluticasone, salmeterol | Yes | 2240835, 2245126, 2245127, 2240836, 2240837 |
| Leukotriene receptor antagonists (LTRA) | Montelukast | Yes | 2247997, 2238217, 2243602, 2238216 |
| Zafirlukast | Yes | 2236606 |
| Anti-immunoglobulin E monoclonal antibody | Omalizumab | Yes | 2260565 |
| Inhaled mast cell stabilizers | Cromoglicic acid | Yes | 2231431, 2231671, 2046113, 534609, 555649, 261238, 638641, 2049082, 2219468 |
| Theophylline | Choline theophyllinate | No | 346071, 405310, 441724, 441732, 451282, 458708, 458716, 476366, 476390, 476412, 503436, 511692, 536709, 565377, 589942, 589950, 792934 |
| Theophylline | No | 156701, 261203, 460982, 460990, 461008, 466409, 488070, 532223, 556742, 575151, 599905, 627410, 631698, 631701, 692689, 692697, 692700, 722065, 1926586, 1926594, 1926608, 1926616, 1926640, 1966219, 1966227, 1966235, 1966243, 1966251, 1966278, 1966286, 2014165, 2014181, 2230085, 2230086, 2230087 |
| Aminophylline | No | 14923, 178497, 497193, 497193, 497207, 582654, 582662, 868450, 2014270, 2014289 |
| Inhaled anticholinergics | Ipratropium bromide | No | 2246084, 2246083, 2163705, 2163713, 2240508, 2240072 |
| No | 2126222, 2243827, 2231494, 731439, 576158, 2247686, 824216, 2026759, 1950681, 2239131, 2216221, 2210479, 2231785, 2236934, 2236935, 2237134, 2237135, 2239627, 2231135, 2231136, 2231245, 2231244, 2097141, 2097176, 2097168 |
| Ipratropium bromide, fenoterol | No | 02148633 |
| Tiotropium bromide | No | 02246793 |
| Other beta-agonists | Epinephrine | No | 2017555, 466417, 525103, 1927582 |
| Ephedrine | No | 2237085, 2229698, 2100231, 2100258, 2243148, 2236722, 2229678, 2219743, 2012111, 2229711, 38121, 2242961, 876534, 893323, 893331, 438847, 2242639, 2126419, 2126400 |
| Isoprenaline | No | 2017652 |
| Orciprenaline | No | 1923870, 1928449, 2017660, 254134, 3859 |
| Other corticosteroids | Cortisone | No | 280437, 16241, 16446, 16438 |
| Triamcinolone | No | 2194090, 15016, 15024, 2194082 |
| Prednisone | No | 610623, 598194, 550957, 312770, 252417, 210188, 868426, 868434, 868442, 21695, 232378, 607517, 508586, 156876, 271373, 271381 |
| Prednisolone | No | 21679, 2230619, 2152541, 2245532 |
| Methylprednisolone | No | 1934325, 1934333, 1934341, 30759, 30767, 36129, 30988, 2245406, 2245400, 2245408, 2245407, 2241229, 2231893, 2231894, 2231895, 2232750, 2232748, 2063727, 2063697, 2063719, 2063700, 36137, 2230210, 2230211, 30678, 30651, 30643 |
| Betamathasone | No | 2237835, 36366, 2063190, 176834, 28096, 28185 |
| Hydrocortisone | No | 888222, 888230, 888206, 888214, 30910, 30929, 872520, 872539, 878618, 878626, 30635, 30600, 30619, 30627 |
| Dexamethasone | N0 | 2261081, 2250055, 213624, 16462, 354309, 716715, 874582, 1977547, 664227, 2204274, 2204266, 295094, 285471, 489158, 2239534, 732893, 732885, 2260301, 2237044, 2260298, 2237046, 2237045, 1946897, 1964976, 1964968, 1964070, 2279363, 783900, 751863, 2311267, 2240687, 2240685, 2240684 |
| Other xanthines | Theophylline, combination | No | 545090, 476374, 334510, 356123, 792942, 721301, 317225, 828718, 640093, 828726, 828742, 307548 |
| Other anti-allergic agents | Levocabastine | No | 2020017 |
| Ketotifen | No | 2221330, 2176084, 2230730, 2218305, 2231680, 2231679, 600784, 577308 |

***NB: Lists of medications used for case definition were indicated in the third column as “Yes”***

**Optimal adherence**

**n=**11,988

**Intermediate adherence**

**n=**9,557

**Low/poor level adherence**

**n=**46,666

**Total Adult asthma patients eligible**

**N= 68,211**

**Figure S1**: Study flow chart for selecting adult asthma patients from the POPDATA BC databases

**Figure S1**: Study flow chart for selecting adult asthma patients from the POPDATA BC databases
